# Supplementary material for: CO2coverage on Pd catalysts accelerates oxygen removal in oxy-combustion systems
Source: Royal Society of Chemistry journal article supplement (doi:10.1039/d2cp04788h), 2023-01-01
Supplement: d2cp04788h1.pdf [file d2cp04788h1.pdf]

## Supporting Information

### CO<sub>2</sub> Coverage Accelerates Oxygen Removal in Oxy-Combustion Systems

Sungyoon Jung<sup>1</sup>, Tengfei Cao<sup>2</sup>, Rohan Mishra<sup>2</sup>, and Pratim Biswas<sup>1,3\*</sup>

<sup>1</sup>Aerosol and Air Quality Research Laboratory  
Department of Energy, Environmental and Chemical Engineering  
Washington University in St. Louis, St. Louis, MO 63130, USA

<sup>2</sup>Department of Mechanical Engineering and Materials Science, and Institute of Materials  
Science and Engineering,  
Washington University in St. Louis, St. Louis, MO 63130, USA

<sup>3</sup>Department of Chemical, Environmental and Materials Engineering  
University of Miami  
Coral Gables, FL 33146, USA

Submitted to

Physical Chemistry Chemical Physics

January 17, 2023

\*To whom correspondence should be addressed:

Tel: +1-305-284-5986

E-mail: [pbiswas@miami.edu](mailto:pbiswas@miami.edu)

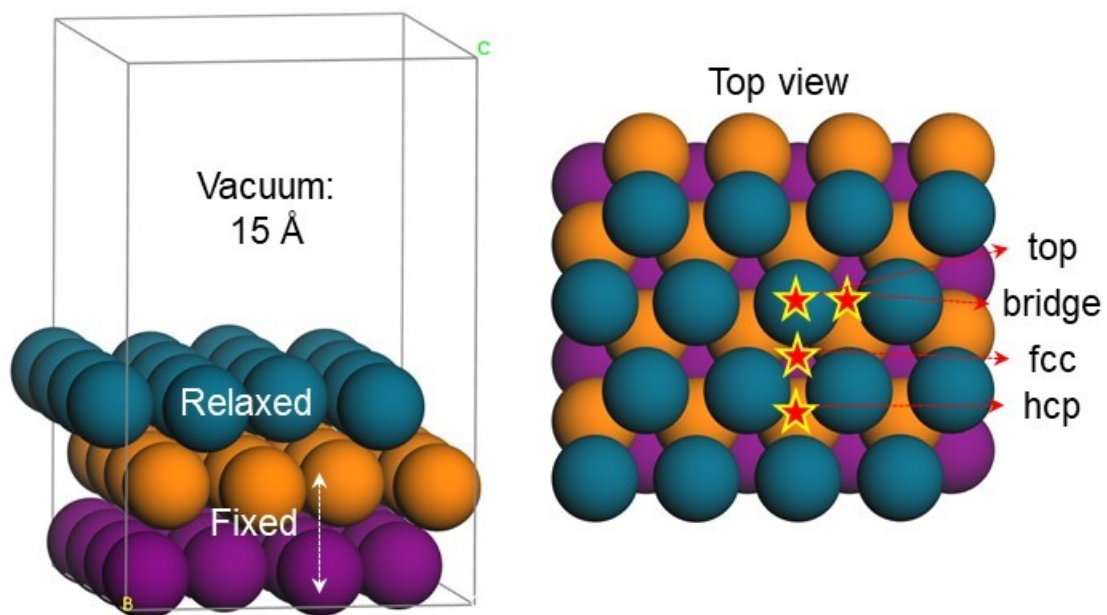

Figure S1. Structure of Pd (111) and adsorption sites on it.

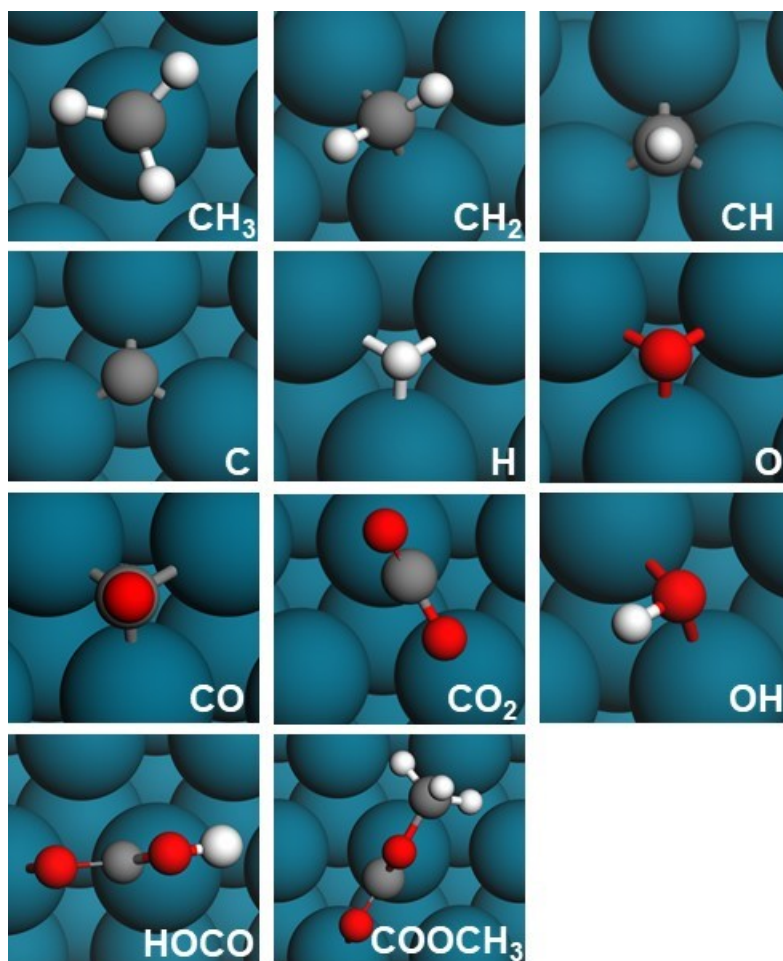

Figure S2. Optimized adsorbate structure on Pd (111) surface. Blue, red, grey, and white atoms represent Pd, O, C, and H atoms, respectively.

Table S1. Reaction rates of CH<sub>4</sub> and 1/2O<sub>2</sub> with Pd-TiO<sub>2</sub> under different feed gas composition (CO<sub>2</sub> concentration).

| CO <sub>2</sub> conc.<br>(mol m <sup>3</sup> ) | $R_{CH_4}$<br>(mmol/g <sub>cat</sub> /hr) |         | $1/2R_{O_2}$<br>(mmol/g <sub>cat</sub> /hr) |         | $\left  \frac{R_{CH_4} - 1/2R_{O_2}}{R_{CH_4}} \right  \times 100$<br>(%) <sup>a</sup> |       |
|------------------------------------------------|-------------------------------------------|---------|---------------------------------------------|---------|----------------------------------------------------------------------------------------|-------|
|                                                | 723 K                                     | 773 K   | 723 K                                       | 773 K   | 723 K                                                                                  | 773 K |
| 0                                              | -0.0637                                   | -0.0689 | -0.0604                                     | -0.0653 | 5.28                                                                                   | 5.35  |
| 12.7                                           | -0.0723                                   | -0.0759 | -0.0719                                     | -0.0757 | 0.46                                                                                   | 0.34  |
| 23.9                                           | -0.0827                                   | -0.0873 | -0.0811                                     | -0.0855 | 1.88                                                                                   | 2.03  |
| 38.6                                           | -0.0891                                   | -0.0909 | -0.0891                                     | -0.0927 | 0.00                                                                                   | 2.02  |

<sup>a</sup> Via complete CH<sub>4</sub> oxidation reaction ( $CH_4 + 2O_2 \rightarrow CO_2 + 2H_2O$ ):

$$\frac{R_{CH_4}}{-1} = \frac{R_{O_2}}{-2}$$

Table S2. Reaction energy ( $\Delta E$ ) and activation energy ( $E_a$ ) for CH<sub>4</sub> dissociation reaction with and without zero-point energy (ZPE) correction.

| Adsorbate        | Configuration | Without ZPE correction |                 | With ZPE correction |                 |
|------------------|---------------|------------------------|-----------------|---------------------|-----------------|
|                  |               | $E_a$ (eV)             | $\Delta E$ (eV) | $E_a$ (eV)          | $\Delta E$ (eV) |
| 1CO <sub>2</sub> | St5           | 1.16                   | 0.010           | 1.19                | 0.164           |
| 2CO <sub>2</sub> | St1+St5       | 1.12                   | 0.026           | 1.10                | 0.168           |
| 3CO <sub>2</sub> | St1+St3+St5   | 1.10                   | 0.021           | 1.08                | 0.155           |
| 1HOCO            | St2           | 1.22                   | 0.083           | 1.21                | 0.256           |
| 2HOCO            | St2+St3       | 1.12                   | 0.181           | 1.10                | 0.320           |
| 3HOCO            | St1+St2+St3   | 1.25                   | 0.304           | 1.23                | 0.482           |

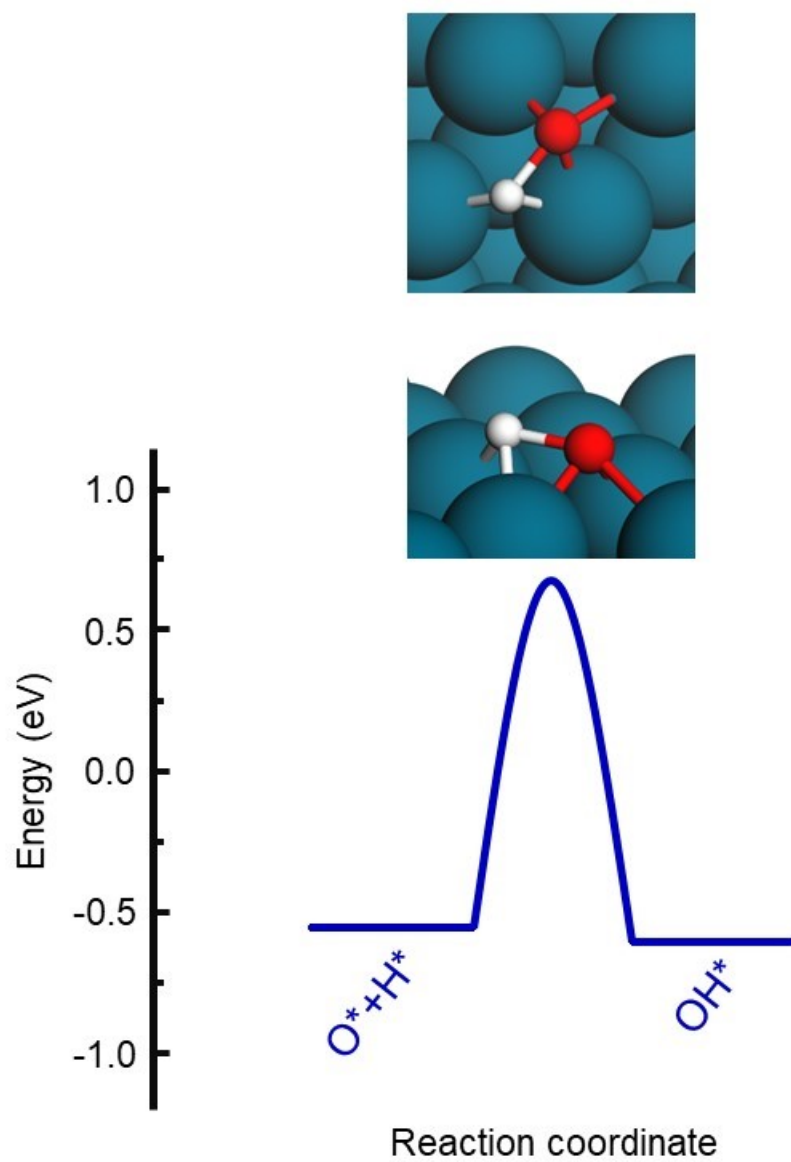

Figure S3. Energy diagram of the reaction of OH\* formation on Pd (111) surface. Blue, red, grey, and white atoms represent Pd, O, C, and H atoms, respectively.

Table S3. Reaction energy ( $\Delta E$ ) and activation energy ( $E_a$ ) for elementary reaction steps on Pd (111).

| No. | Elementary step                                                                       | $\Delta E$ (eV) | $E_a$ (eV) |
|-----|---------------------------------------------------------------------------------------|-----------------|------------|
| 1   | $\text{CH}_4+2^* \rightarrow \text{CH}_3^*+\text{H}^*$                                | -0.09           | 1.29       |
|     | $\text{CH}_4+3\text{CO}_2^*+2^* \rightarrow \text{CH}_3^*+\text{H}^*+3\text{CO}_2^*$  | 0.02            | 1.10       |
| 2   | $\text{CH}_3^*+^* \rightarrow \text{CH}_2^*+\text{H}^*$                               | 0.01            | 1.73       |
|     | $\text{CH}_3^*+3\text{CO}_2^*+^* \rightarrow \text{CH}_2^*+\text{H}^*+3\text{CO}_2^*$ | 0.22            | 1.64       |
| 3   | $\text{CH}_2^*+^* \rightarrow \text{CH}^*+\text{H}^*$                                 | -0.54           | 0.39       |
|     | $\text{CH}_2^*+3\text{CO}_2^*+^* \rightarrow \text{CH}^*+\text{H}^*+3\text{CO}_2^*$   | -0.43           | 0.35       |
| 4   | $\text{CH}^*+^* \rightarrow \text{C}^*+\text{H}^*$                                    | 0.34            | 1.86       |
|     | $\text{CH}^*+3\text{CO}_2^*+^* \rightarrow \text{C}^*+\text{H}^*+3\text{CO}_2^*$      | -0.31           | 1.48       |
| 5   | $\text{C}^*+\text{O}^* \rightarrow \text{CO}^*+^*$                                    | -2.11           | 2.48       |
|     | $\text{C}^*+\text{O}^*+3\text{CO}_2^* \rightarrow \text{CO}^*+^*+3\text{CO}_2^*$      | -2.25           | 2.43       |
| 6   | $\text{CO}^*+\text{O}^* \rightarrow \text{CO}_2^*+^*$                                 | 0.12            | 2.34       |
|     | $\text{CO}^*+\text{O}^*+3\text{CO}_2^* \rightarrow \text{CO}_2^*+^*+3\text{CO}_2^*$   | -0.03           | 2.39       |
